# Supplementary material for: Spiritual Well-Being and Quality of Life Among Newly Diagnosed Palestinian Women with Breast Cancer: A Prospective Study
Source: Research Square preprint supplement (doi:10.21203/rs.3.rs-7649759/v1), 2025-11-05
Supplement: Supplementary file 1 [file cf24c3385c1e903920d03854.docx]

**Table 1S: Spiritual Well-Being and socio-demographic, clinical and social support variables (N=144)**

| **Variables** | **Meaning** | **Peace** | **Faith** | **TOTAL score** |
| --- | --- | --- | --- | --- |
|  | **Mean rank** | **Mean rank** | **Mean rank** | **Mean rank** |
| **Residence** |  |  |  |  |
| Refugee camp | 45.55 | 54.36 | 65.91 | 51.27 |
| Village | 74.53 | 76.93 | 75.00 | 76.72 |
| City | 75.15 | 67.87 | 68.95 | 69.10 |
| **P-value** | 0.08 | 0.16 | 0.63 | 0.13 |
| **Age in years** |  |  |  |  |
| ≤ 40 | 68.95 | 57.69 | 58.85 | 59.66 |
| >45 | 76.36 | 88.59 | 87.34 | 86.46 |
| **P-value** | 0.284 | **0.000** | **0.000** | **0.000** |
| **Marital status** |  |  |  |  |
| Unmarried | 56.33 | 70.45 | 73.35 | 66.48 |
| Married | 75.11 | 72.83 | 72.36 | 73.47 |
| **P-value** | 0.06 | 0.81 | 0.92 | 0.49 |
| **Education** |  |  |  |  |
| Primary and less | 50.05 | 76.92 | 92.05 | 75.32 |
| Secondary | 73.71 | 73.04 | 71.99 | 72.59 |
| Colleague/University | 77.82 | 70.78 | 67.40 | 71.62 |
| **P-value** | **0.03** | 0.84 | 0.07 | 0.94 |
| **Working status** |  |  |  |  |
| Employee | 88.16 | 84.73 | 72.00 | 82.59 |
| Housewife | 66.27 | 67.63 | 72.70 | 68.49 |
| **P-value** | **0.004** | **0.02** | 0.92 | 0.06 |
| **Number of children** |  |  |  |  |
| ≤5 persons | 72.38 | 70.32 | 65.80 | 68.35 |
| >5 persons | 72.76 | 77.14 | 86.77 | 81.35 |
| **P-value** | 0.96 | 0.36 | **0.005** | 0.08 |
| **Family size** |  |  |  |  |
| ≤5 persons | 75.21 | 79.03 | 75.69 | 77.52 |
| >5 persons | 71.02 | 68.92 | 70.75 | 69.75 |
| **P-value** | 0.56 | 0.16 | 0.49 | 0.28 |
| **Income (US $)** |  |  |  |  |
| < 570 | 66.96 | 69.34 | 70.28 | 67.28 |
| 570-1140 | 74.50 | 72.15 | 71.91 | 73.51 |
| > 1140 | 77.75 | 78.30 | 77.22 | 79.09 |
| **P-value** | 0.45 | 0.62 | 0.74 | 0.43 |
| **Stage at diagnosis** |  |  |  |  |
| Stage 1 | 90.09 | 94.68 | 64.68 | 85.55 |
| Stage 2 | 76.07 | 71.23 | 73.91 | 73.80 |
| Stage 3 | 68.68 | 73.24 | 74.37 | 72.15 |
| Stage 4 | 57.25 | 50.65 | 60.80 | 52.90 |
| **P-value** | 0.22 | 0.11 | 0.71 | 0.34 |
| Chemotherapy |  |  |  |  |
| Yes | 72.78 | 72.73 | 73.63 | 73.05 |
| No | 62.75 | 64.50 | 32.88 | 53.25 |
| **P-value** | 0.63 | 0.69 | 0.05 | 0.35 |
| Radiotherapy |  |  |  |  |
| Yes | 74.08 | 74.78 | 73.81 | 73.96 |
| No | 68.24 | 66.37 | 68.96 | 68.58 |
| **P-value** | 0.45 | 0.28 | 0.53 | 0.49 |
| Hormonal therapy |  |  |  |  |
| Yes | 72.48 | 70.15 | 71.66 | 71.10 |
| No | 72.64 | 86.26 | 77.43 | 80.71 |
| **P-value** | 0.98 | 0.10 | 0.55 | 0.32 |
| Biological treatment |  |  |  |  |
| Yes | 71.56 | 70.83 | 68.29 | 70.26 |
| No | 73.49 | 74.26 | 76.95 | 74.86 |
| **P-value** | 0.78 | 0.62 | 0.20 | 0.50 |
| Surgical intervention |  |  |  |  |
| Complete Mastectomy | 67.42 | 65.91 | 71.66 | 67.29 |
| Partial Mastectomy | 75.92 | 76.95 | 73.07 | 76.01 |
| **P-value** | 0.22 | 0.11 | 0.84 | 0.21 |
| Chronic disease |  |  |  |  |
| Yes | 70.06 | 85.69 | 83.23 | 81.90 |
| No | 73.68 | 66.11 | 67.30 | 67.94 |
| **P-value** | 0.62 | **0.008** | **0.030** | 0.059 |
| Pain Medication |  |  |  |  |
| Yes | 69.44 | 75.55 | 74.15 | 73.55 |
| No | 76.91 | 68.10 | 70.12 | 70.99 |
| **P-value** | 0.28= | 0.290 | 0.565 | 0.717 |
| **Relatives cancer** |  |  |  |  |
| Breast Cancer | 72.18 | 75.65 | 64.86 | 70.40 |
| Other Cancers | 73.06 | 66.11 | 72.71 | 69.10 |
| No history of cancer | 72.41 | 73.91 | 76.82 | 75.44 |
| **P-value** | 0.99 | 0.56 | 0.34 | 0.71 |
| Family support |  |  |  |  |
| Yes | 71.11 | 72.52 | 73.57 | 72.29 |
| No | 81.10 | 72.35 | 65.88 | 73.83 |
| **P-value** | 0.31 | 0.98 | 0.44 | 0.87 |
| Husband support |  |  |  |  |
| Yes | 74.40 | 70.81 | 70.95 | 72.23 |
| No | 71.67 | 73.25 | 73.18 | 72.62 |
| **P-value** | 0.71 | 0.74 | 0.76 | 0.95 |
| Other support |  |  |  |  |
| Yes | 80.62 | 79.90 | 70.87 | 77.98 |
| No | 70.71 | 70.87 | 72.86 | 71.29 |
| **P-value** | 0.27 | 0.31 | 0.82 | 0.45 |

**Table 2S: EORTC QLQ-C23 functional scales and socio-demographic, clinical and social support variables (N=144)**

| **Variables** | **Body image** | **Sexual functioning-** | **Sexual enjoyment** | **Future perceptive** |
| --- | --- | --- | --- | --- |
|  | Mean rank | Mean rank | Mean rank | Mean rank |
| **Residence** |  |  |  |  |
| Refugee camp | 54.77 | 68.73 | 72.14 | 73.59 |
| Village | 75.24 | 70.36 | 69.85 | 67.49 |
| City | 71.29 | 77.95 | 78.14 | 82.71 |
| **P-value** | 0.29 | 0.58 | 0.52 | 0.09 |
| **Age in years** |  |  |  |  |
| ≤ 40 | 54.09 | 86.03 | 86.03 | 86.03 |
| >45 | 92.51 | 57.80 | 57.80 | 57.80 |
| **P-value** | **0.000** | **0.000** | **0.001** | 0.71 |
| **Marital status** |  |  |  |  |
| Unmarried | 87.70 | 20.00 | 26.98 | 77.33 |
| Married | 70.05 | 80.97 | 79.84 | 71.72 |
| **P-value** | **0.04** | **0.000** | **0.000** | 0.54 |
| **Education** |  |  |  |  |
| Primary and less | 99.95 | 47.50 | 48.87 | 68.45 |
| Secondary | 71.96 | 72.73 | 72.97 | 73.99 |
| Colleague/University | 65.19 | 79.39 | 78.80 | 72.36 |
| **P-value** | **0.005** | **0.01** | **0.01** | 0.85 |
| **Working status** |  |  |  |  |
| Employee | 74.06 | 85.50 | 81.85 | 81.85 |
| Housewife | 71.88 | 67.33 | 68.78 | 68.78 |
| **P-value** | 0.77 | **0.01** | 0.07 | 0.64 |
| **Number of children** |  |  |  |  |
| ≤5 persons | 69.89 | 73.22 | 74.48 | 71.59 |
| >5 persons | 78.07 | 70.97 | 68.27 | 74.43 |
| **P-value** | 0.27 | 0.75 | 0.37 | 0.67 |
| **Family size** |  |  |  |  |
| ≤5 persons | 81.88 | 67.50 | 66.35 | 75.60 |
| >5 persons | 67.35 | 75.24 | 75.87 | 70.80 |
| **P-value** | **0.04** | 0.27 | 0.16 | 0.46 |
| **Income (US $)** |  |  |  |  |
| < 570 | 69.07 | 70.00 | 66.60 | 73.77 |
| 570-1140 | 72.64 | 72.13 | 73.53 | 72.34 |
| > 1140 | 77.81 | 77.27 | 80.17 | 70.73 |
| **P-value** | 0.64 | 0.72 | 0.29 | 0.93 |
| **Stage at diagnosis** |  |  |  |  |
| Stage 1 | 71.82 | 81.86 | 74.36 | 78.50 |
| Stage 2 | 78.36 | 69.34 | 72.40 | 72.23 |
| Stage 3 | 70.45 | 75.25 | 73.82 | 66.68 |
| Stage 4 | 52.60 | 62.60 | 62.50 | 80.00 |
| **P-value** | 0.30 | 0.61 | 0.86 | **0.03** |
| Chemotherapy |  |  |  |  |
| Yes | 72.95 | 72.09 | 72.51 | 71.57 |
| No | 56.88 | 86.88 | 72.25 | 105.13 |
| **P-value** | 0.44 | 0.47 | 0.99 | 0.08 |
| Radiotherapy |  |  |  |  |
| Yes | 74.43 | 74.00 | 72.95 | 70.42 |
| No | 67.31 | 68.47 | 71.28 | 78.10 |
| **P-value** | 0.36 | 0.47 | 0.82 | 0.27 |
| Hormonal therapy |  |  |  |  |
| Yes | 71.15 | 74.22 | 72.95 | 70.03 |
| No | 80.43 | 62.40 | 69.86 | 86.98 |
| **P-value** | 0.34 | 0.22 | 0.73 | 0.06 |
| Biological treatment |  |  |  |  |
| Yes | 65.56 | 81.22 | 79.51 | 79.51 |
| No | 79.84 | 63.28 | 65.09 | 65.09 |
| **P-value** | **0.03** | **0.009** | **0.02** | **0.02** |
| Surgical intervention |  |  |  |  |
| Complete Mastectomy | 60.28 | 64.97 | 64.57 | 74.47 |
| Partial Mastectomy | 80.74 | 77.58 | 77.85 | 71.17 |
| **P-value** | **0.004** | 0.07 | **0.04** | 0.60 |
| Chronic disease |  |  |  |  |
| Yes | 93.36 | 52.56 | 60.98 | 78.34 |
| No | 62.39 | 82.16 | 78.08 | 69.67 |
| **P-value** | **0.000** | **0.000** | **0.01** | 0.19 |
| Pain Medication |  |  |  |  |
| Yes | 77.71 | 64.71 | 66.22 | 78.19 |
| No | 65.00 | 83.73 | 81.55 | 64.31 |
| **P-value** | 0.07 | **0.01** | **0.02** | **0.03** |
| **Relatives cancer** |  |  |  |  |
| Breast Cancer | 71.65 | 77.78 | 76.55 | 78.69 |
| Other Cancers | 70.16 | 73.73 | 72.24 | 70.94 |
| No history of cancer | 74.18 | 68.82 | 70.28 | 69.70 |
| **P-value** | 0.88 | 0.53 | 0.72 | 0.47 |
| Family support |  |  |  |  |
| Yes | 72.74 | 74.11 | 74.58 | 72.22 |
| No | 71.00 | 62.53 | 59.63 | 74.25 |
| **P-value** | 0.86 | 0.24 | 0.11 | 0.82 |
| Husband support |  |  |  |  |
| Yes | 0.153 | 89.88 | 94.48 | 67.50 |
| No | 0.153 | 64.86 | 62.83 | 74.70 |
| **P-value** | 0.07 | **0.001** | **0.000** | 0.29 |
| Other support |  |  |  |  |
| Yes | 83.31 | 68.62 | 65.02 | 67.29 |
| No | 70.12 | 73.36 | 74.15 | 73.65 |
| **P-value** | 0.14 | 0.59 | 0.28 | 0.43 |

**Table 3S: EORTC QLQ-C 23 Symptom scales and socio-demographic, clinical and social support variables (N=144)**

| **Variables** | **Systemic therapy side effect** | **Breast symptom** | **Arm symptoms** | **Upset by hair loss** |
| --- | --- | --- | --- | --- |
|  | Mean rank | Mean rank | Mean rank | Mean rank |
| **Residence** |  |  |  |  |
| Refugee camp | 93.73 | 94.05 | 88.59 | 69.32 |
| Village | 71.92 | 69.69 | 69.26 | 73.59 |
| City | 68.29 | 72.87 | 75.16 | 71.03 |
| **P-value** | 0.18 | 0.18 | 0.30 | 0.85 |
| **Age in years** |  |  |  |  |
| ≤ 40 | 60.13 | 68.67 | 68.93 | 72.74 |
| >45 | 85.94 | 76.67 | 76.38 | 72.24 |
| **P-value** | **0.000** | 0.24 | 0.27 | 0.92 |
| **Marital status** |  |  |  |  |
| Unmarried | 81.10 | 73.08 | 71.78 | 79.40 |
| Married | 71.11 | 72.41 | 72.62 | 71.39 |
| **P-value** | 0.31 | 0.94 | 0.93 | 0.29 |
| **Education** |  |  |  |  |
| Primary and less | 94.92 | 93.53 | 94.13 | 76.71 |
| Secondary | 71.45 | 68.28 | 72.62 | 66.76 |
| Colleague/University | 67.05 | 70.19 | 66.26 | 76.28 |
| **P-value** | **0.03** | 0.058 | **0.03** | 0.20 |
| **Working status** |  |  |  |  |
| Employee | 68.15 | 69.56 | 67.07 | 69.26 |
| Housewife | 74.23 | 73.67 | 74.66 | 73.79 |
| **P-value** | 0.42 | 0.59 | 0.32 | 0.43 |
| **Number of children** |  |  |  |  |
| ≤5 persons | 71.05 | 69.23 | 69.46 | 71.83 |
| >5 persons | 75.59 | 79.47 | 78.98 | 73.93 |
| **P-value** | 0.54 | 0.16 | 0.19 | 0.70 |
| **Family size** |  |  |  |  |
| ≤5 persons | 69.23 | 65.00 | 70.11 | 70.07 |
| >5 persons | 74.30 | 76.61 | 73.81 | 73.83 |
| **P-value** | 0.48 | 0.10 | 0.60 | 0.49 |
| **Income (US $)** |  |  |  |  |
| < 570 | 72.84 | 70.63 | 67.02 | 71.38 |
| 570-1140 | 73.18 | 68.76 | 71.81 | 75.45 |
| > 1140 | 70.67 | 82.55 | 82.70 | 68.78 |
| **P-value** | 0.96 | 0.29 | 0.23 | 0.59 |
| **Stage at diagnosis** |  |  |  |  |
| Stage 1 | 76.59 | 55.91 | 60.77 | 72.50 |
| Stage 2 | 74.73 | 79.02 | 80.84 | 77.55 |
| Stage 3 | 71.09 | 69.20 | 67.26 | 67.32 |
| Stage 4 | 64.20 | 74.40 | 71.10 | 76.90 |
| **P-value** | 0.86 | 0.30 | 0.23 | 0.33 |
| Chemotherapy |  |  |  |  |
| Yes | 73.14 | 72.74 | 72.42 | 72.58 |
| No | 50.25 | 64.00 | 75.38 | 69.75 |
| **P-value** | 0.27 | 0.67 | 0.88 | 0.86 |
| Radiotherapy |  |  |  |  |
| Yes | 74.45 | 73.75 | 77.07 | 71.73 |
| No | 67.24 | 69.14 | 60.21 | 74.58 |
| **P-value** | 0.35 | 0.55 | **0.02** | 0.63 |
| Hormonal therapy |  |  |  |  |
| Yes | 70.94 | 72.20 | 73.04 | 68.91 |
| No | 81.64 | 74.26 | 69.33 | 93.55 |
| **P-value** | 0.27 | 0.83 | 0.70 | **0.001** |
| Biological treatment |  |  |  |  |
| Yes | 67.41 | 67.61 | 67.34 | 71.39 |
| No | 77.88 | 77.67 | 77.96 | 73.67 |
| **P-value** | 0.13 | 0.14 | 0.12 | 0.66 |
| Surgical intervention |  |  |  |  |
| Complete Mastectomy | 75.59 | 65.82 | 57.09 | 69.57 |
| Partial Mastectomy | 70.41 | 77.01 | 82.90 | 74.48 |
| **P-value** | 0.46 | 0.11 | **0.000** | 0.36 |
| Chronic disease |  |  |  |  |
| Yes | 84.27 | 77.33 | 79.01 | 65.01 |
| No | 66.80 | 70.16 | 69.35 | 76.13 |
| **P-value** | **0.01** | 0.33 | 0.18 | **0.04** |
| Pain Medication |  |  |  |  |
| Yes | 77.38 | 76.12 | 72.62 | 74.54 |
| No | 65.47 | 67.29 | 72.32 | 69.57 |
| **P-value** | 0.09 | 0.20 | 0.96 | 0.35 |
| **Relatives cancer** |  |  |  |  |
| Breast Cancer | 73.19 | 66.41 | 72.35 | 83.85 |
| Other Cancers | 76.57 | 76.96 | 75.41 | 70.79 |
| No history of cancer | 70.04 | 73.77 | 71.11 | 66.79 |
| **P-value** | 0.74 | 0.51 | 0.881 | 0.02 |
| Family support |  |  |  |  |
| Yes | 72.71 | 75.92 | 73.92 | 71.70 |
| No | 71.20 | 51.33 | 63.68 | 77.45 |
| **P-value** | 0.88 | **0.01** | 0.30 | 0.45 |
| Husband support |  |  |  |  |
| Yes | 65.55 | 72.02 | 80.31 | 70.11 |
| No | 75.56 | 72.71 | 69.07 | 73.55 |
| **P-value** | 0.18 | 0.92 | 0.13 | 0.54 |
| Other support |  |  |  |  |
| Yes | 69.13 | 64.85 | 66.87 | 70.31 |
| No | 73.24 | 74.19 | 73.74 | 72.98 |
| **P-value** | 0.64 | 0.29 | 0.44 | 0.69 |
